# Supplementary material for: ZnO decorated with organic nanoparticles based sensor for the ratiometric selective determination of mercury ions
Source: Royal Society of Chemistry journal article supplement (doi:10.1039/c5nj03099d), 2015-11-25
Supplement: c5nj03099d1.pdf [file c5nj03099d1.pdf]

## Supplementary Information

### **ZnO decorated with organic nanoparticles based sensor for ratiometric selective determination of mercury ions**

Narinder Kaur,<sup>a†</sup> Jasmininder Singh,<sup>b†</sup> Pushap Raj<sup>b</sup>, Narinder Singh,<sup>b\*</sup> Harpreet Singh,<sup>c</sup> Sanjeev K. Sharma,<sup>a\*</sup> Deuk Young Kim,<sup>a</sup> Navneet Kaur<sup>d,e\*</sup>

<sup>a</sup>Semiconductor Materials and Device Laboratory, Department of Semiconductor Science, Dongguk University-Seoul, Seoul 100715, Republic of Korea

<sup>b</sup>Department of Chemistry, Indian Institute of Technology (IIT) Ropar, Rupnagar, Panjab 140001, India. E-mail: nsingh@iitrpr.ac.in

<sup>c</sup>School of Mechanical, Materials & Energy Engineering, IIT Ropar, Rupnagar, Punjab 140001, India

<sup>d</sup>Centre for Nanoscience and Nanotechnology (UIEAST), Panjab University, Chandigarh, India, 160014.

<sup>e</sup>Department of Chemistry, Panjab University, Chandigarh, India, 160014; E-mail: navneetkaur@pu.ac.in

<sup>†</sup>*Both authors contributed equally*

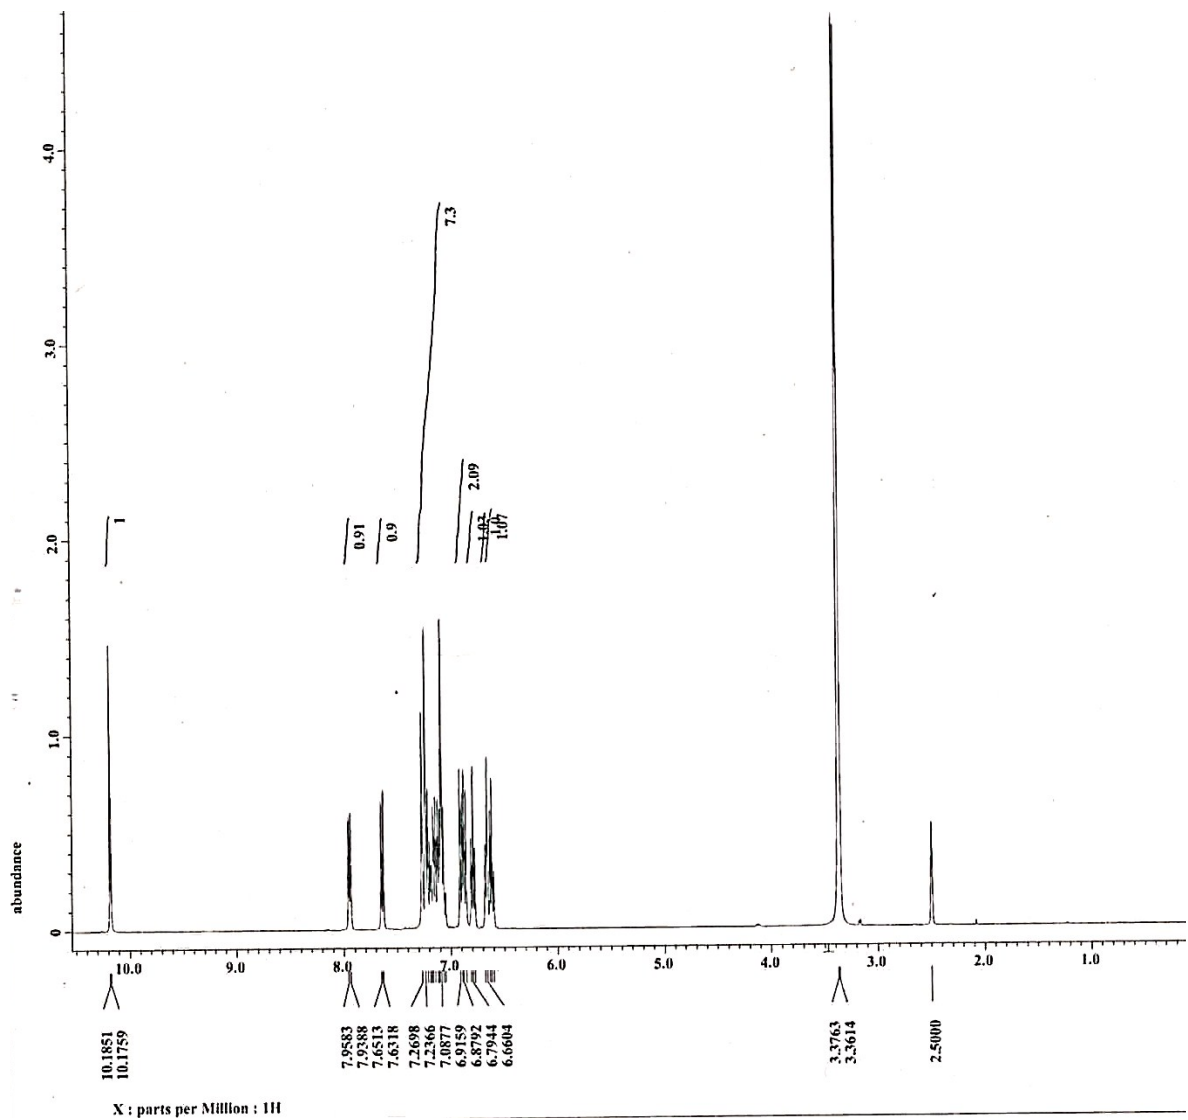

**Figure S1:**  $^1\text{H}$  NMR of R1

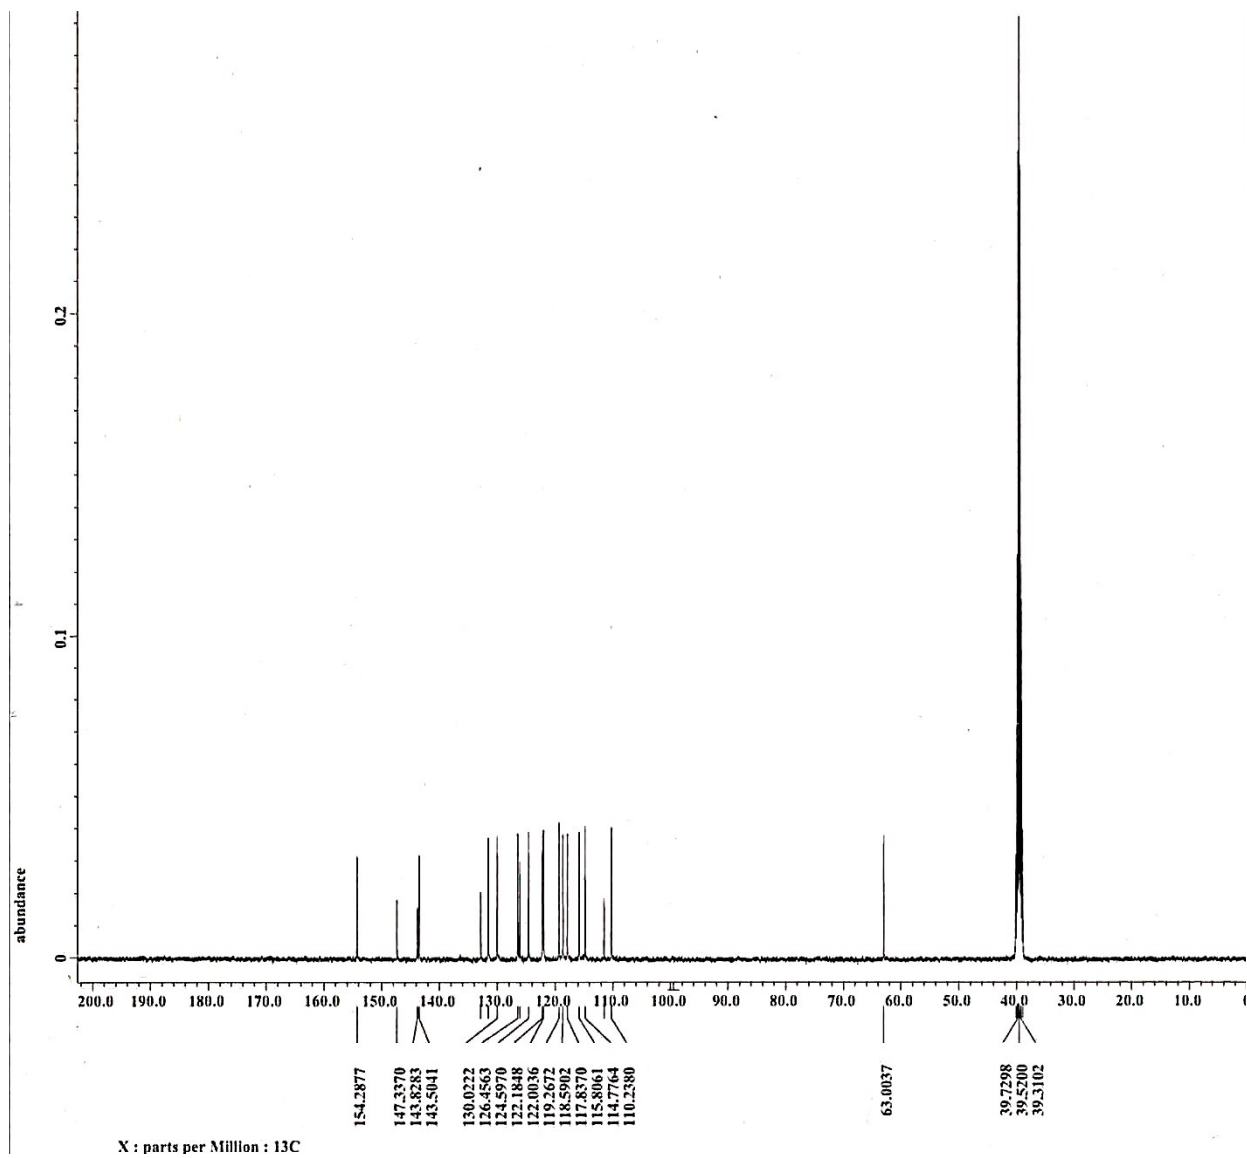

Figure S2:  $^{13}\text{C}$  NMR of R1

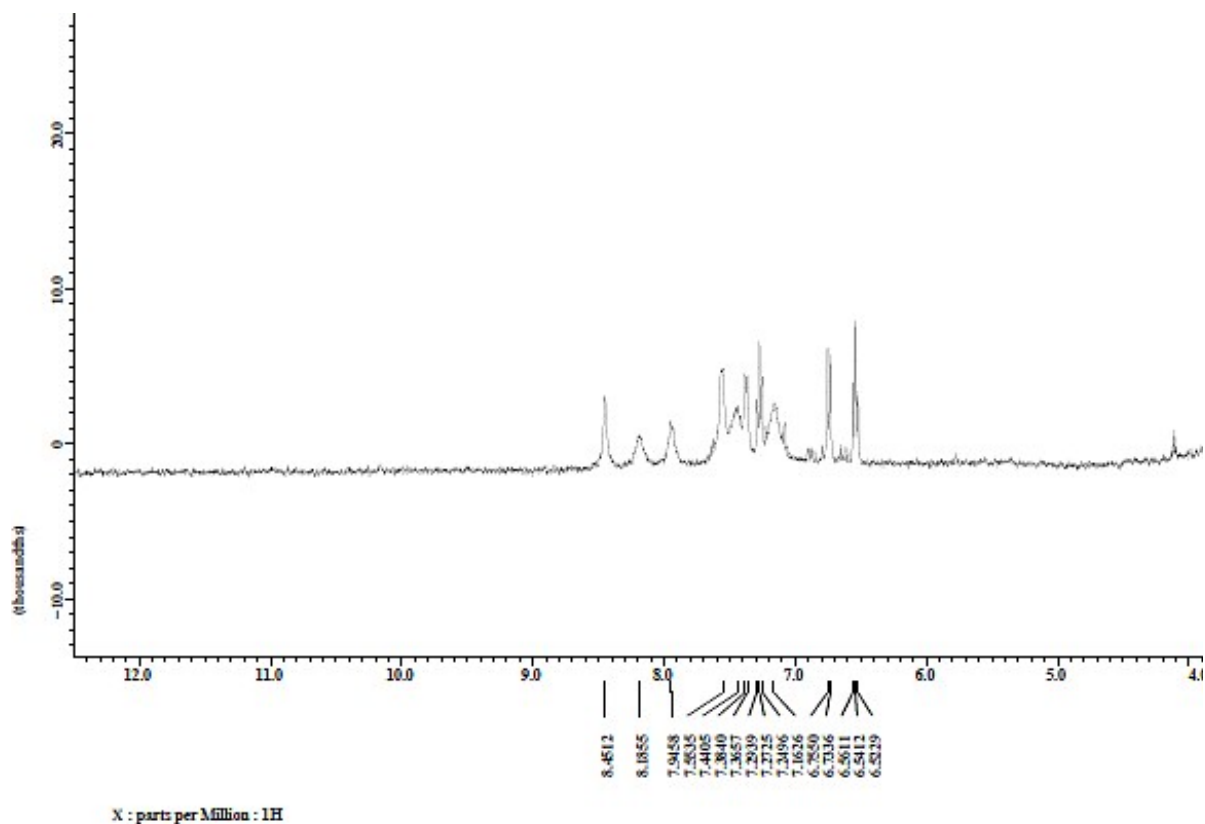

**Figure S3:**  $^1\text{H}$  NMR of **R1** coated on surface of ZnO

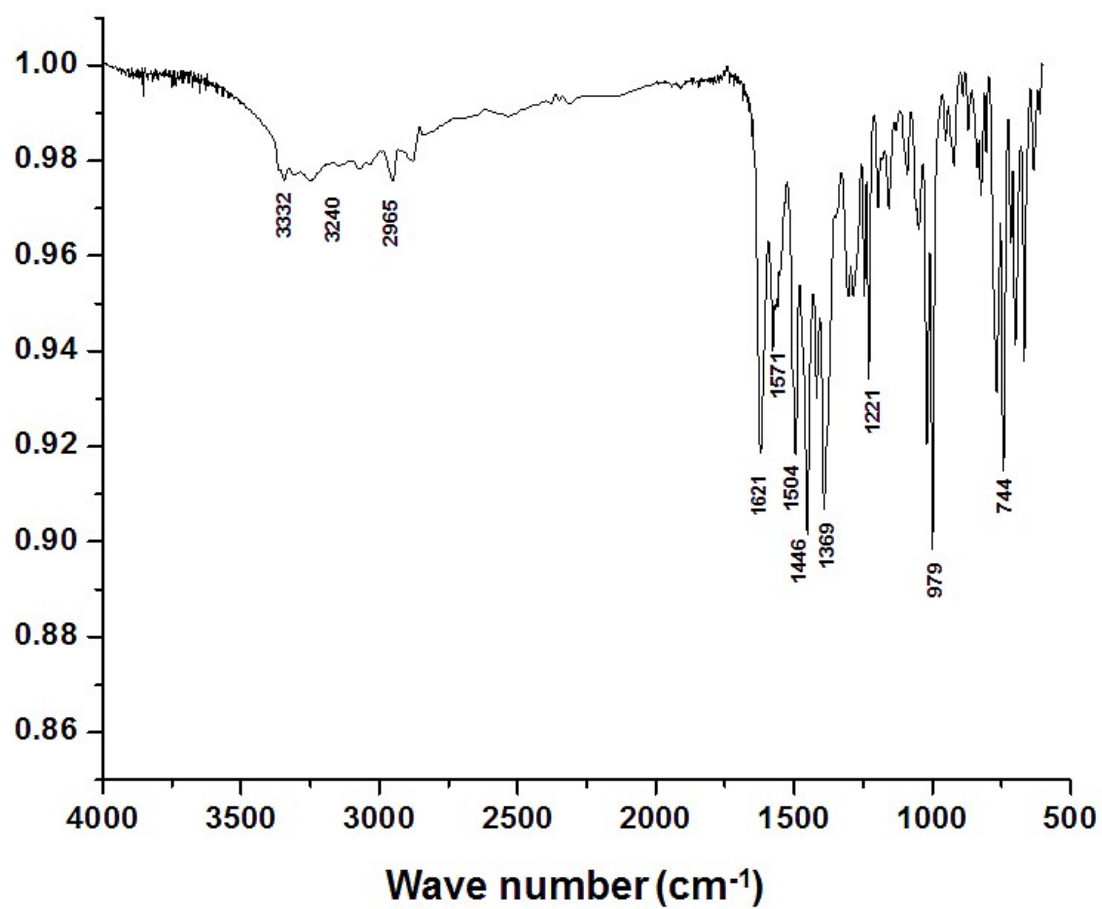

**Figure S4 a:** IR spectrum of **R1**

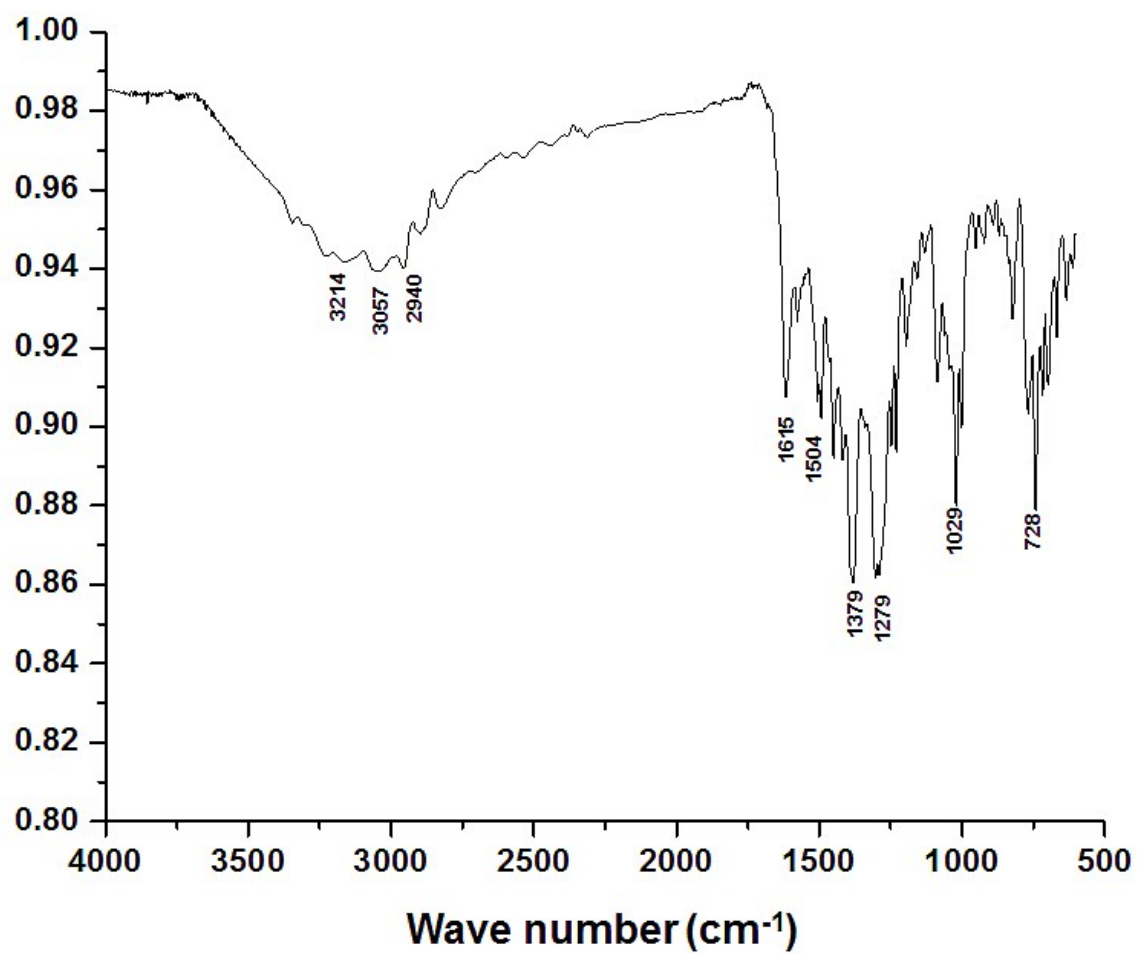

**Figure S4 b:** IR spectrum of **N1** i.e. **R1** coated on the surface of ZnO

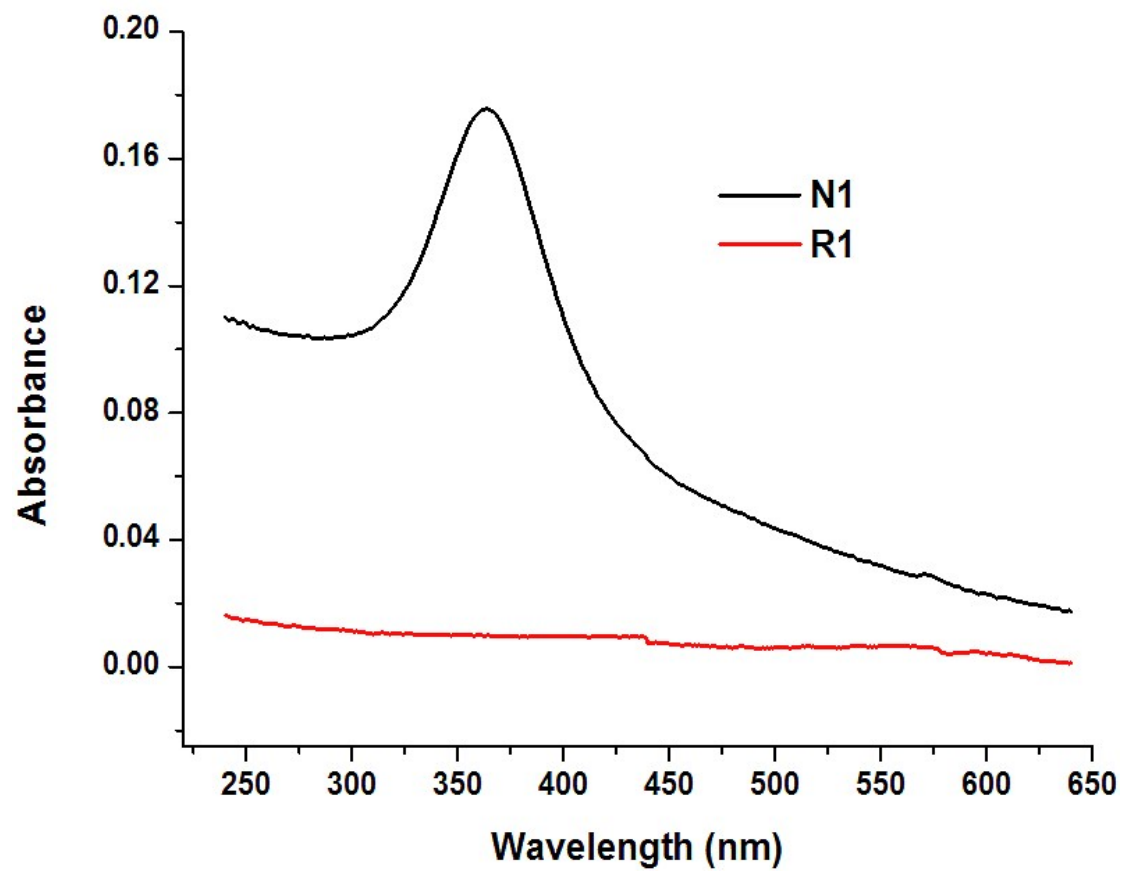

**Figure S5:** Comparison of absorption profile of prepared receptor (**R1**) and **R1** coated on surface of ZnO (**N1**)

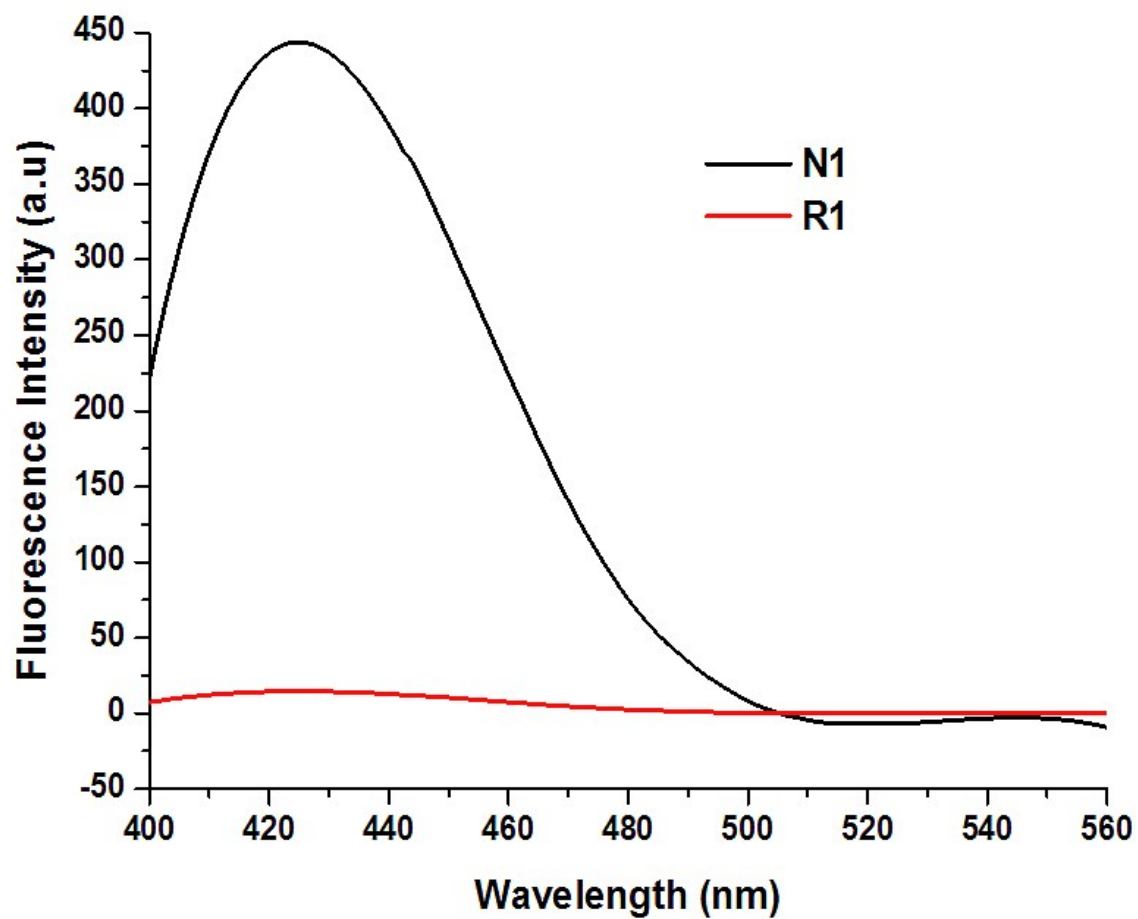

**Figure S6:** Comparison of fluorescence profile of prepared receptor (**R1**) and **R1** coated on surface of ZnO (**N1**)



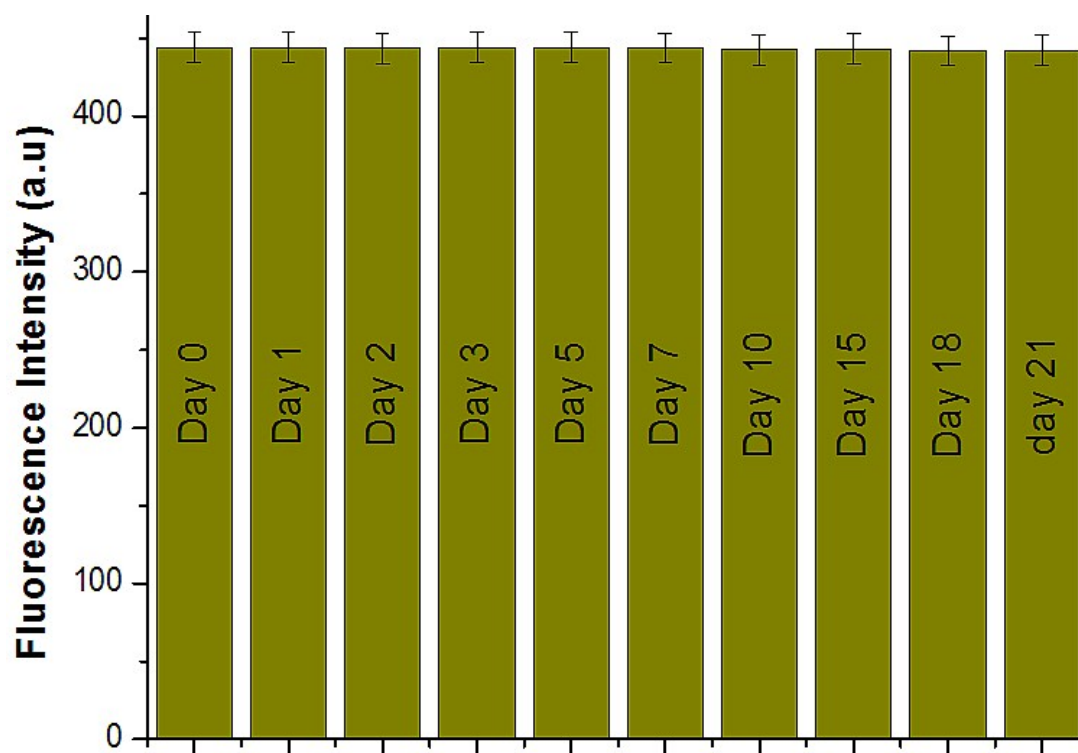

**Figure S7:** Bar diagram showing stability of **N1** fluorescence response in due course of time
